# Supplementary figures and images for: In Silico Exploration of Mycobacterium tuberculosis Metabolic Networks Shows Host-Associated Convergent Fluxomic Phenotypes
Source: MDPI journal article supplement (doi:10.3390/biom12030376), 2022-02-28

reaction

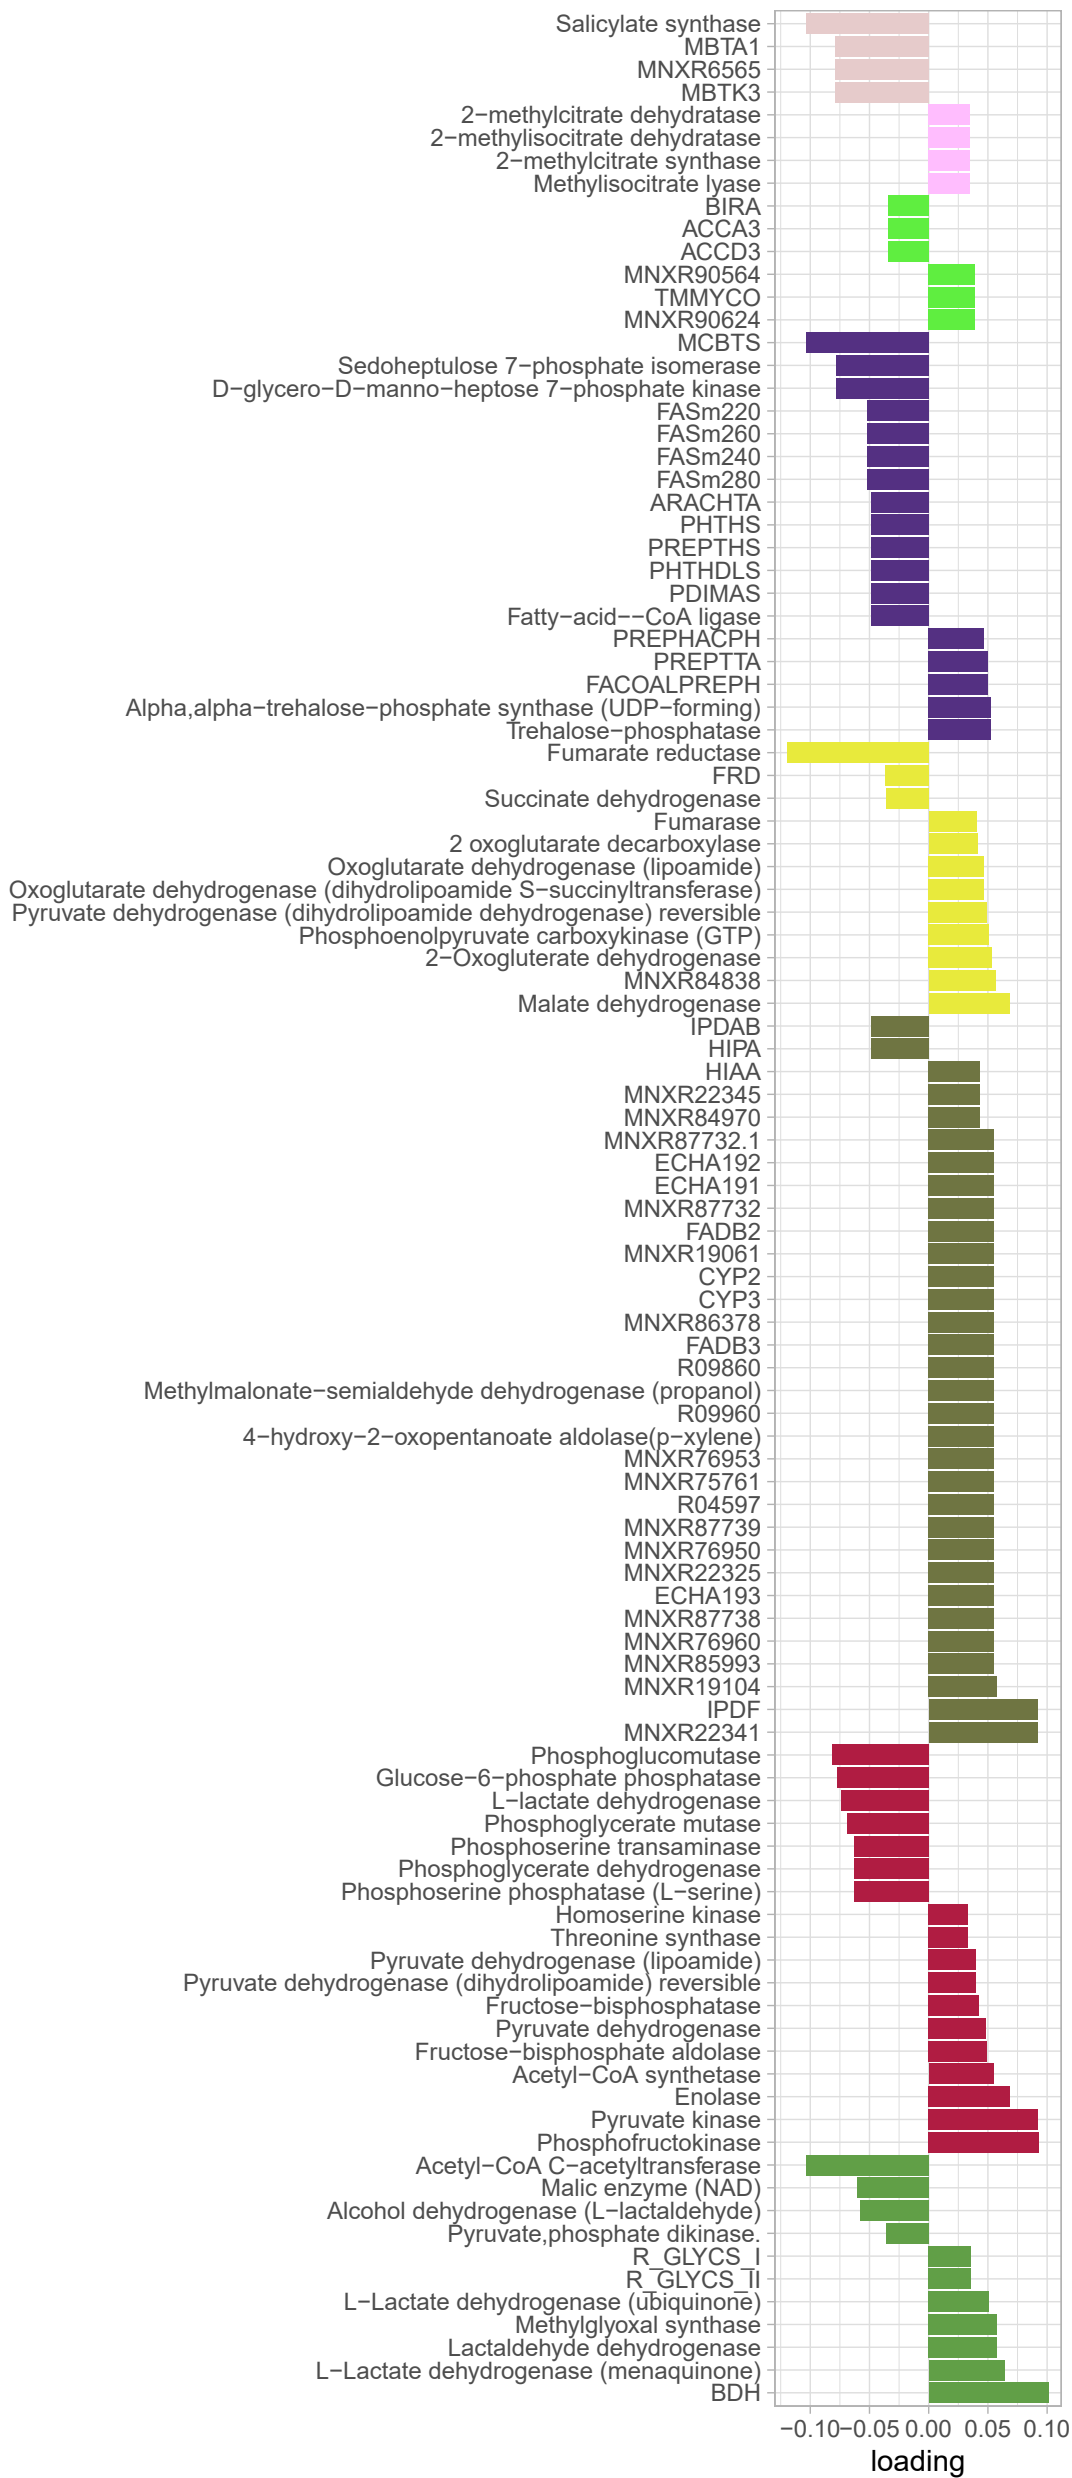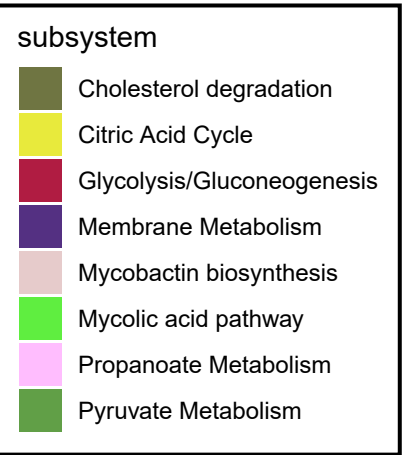

Supplement: s1 [file s1]

A

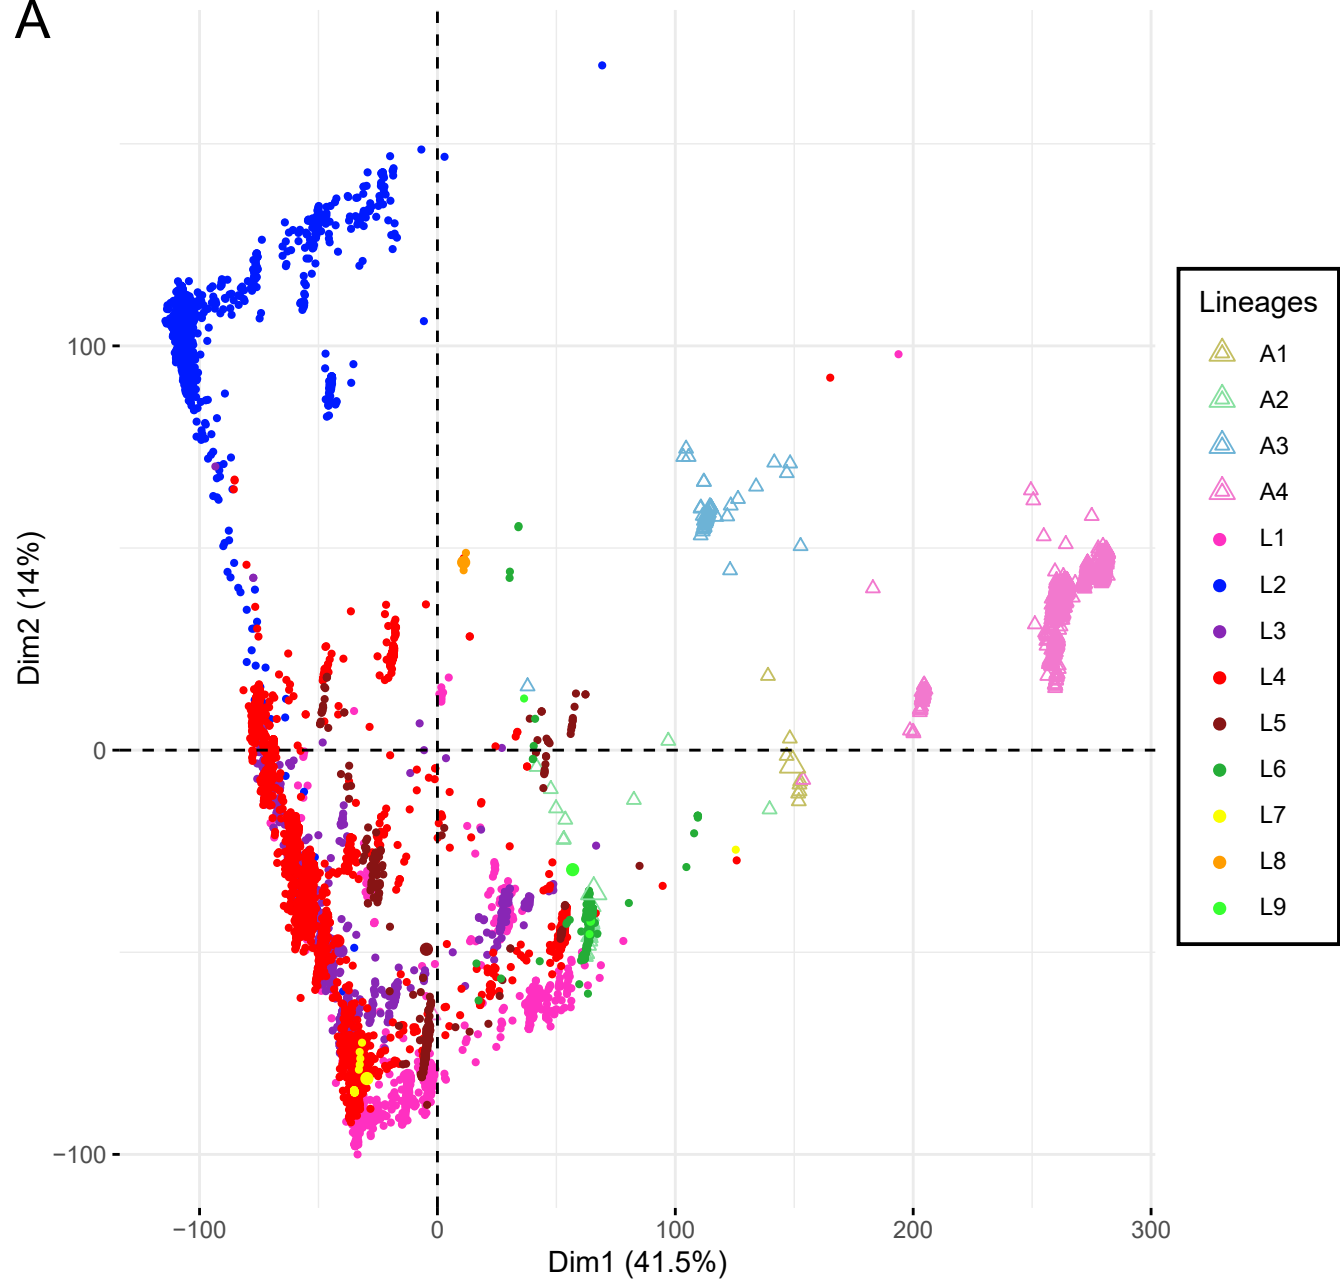

B

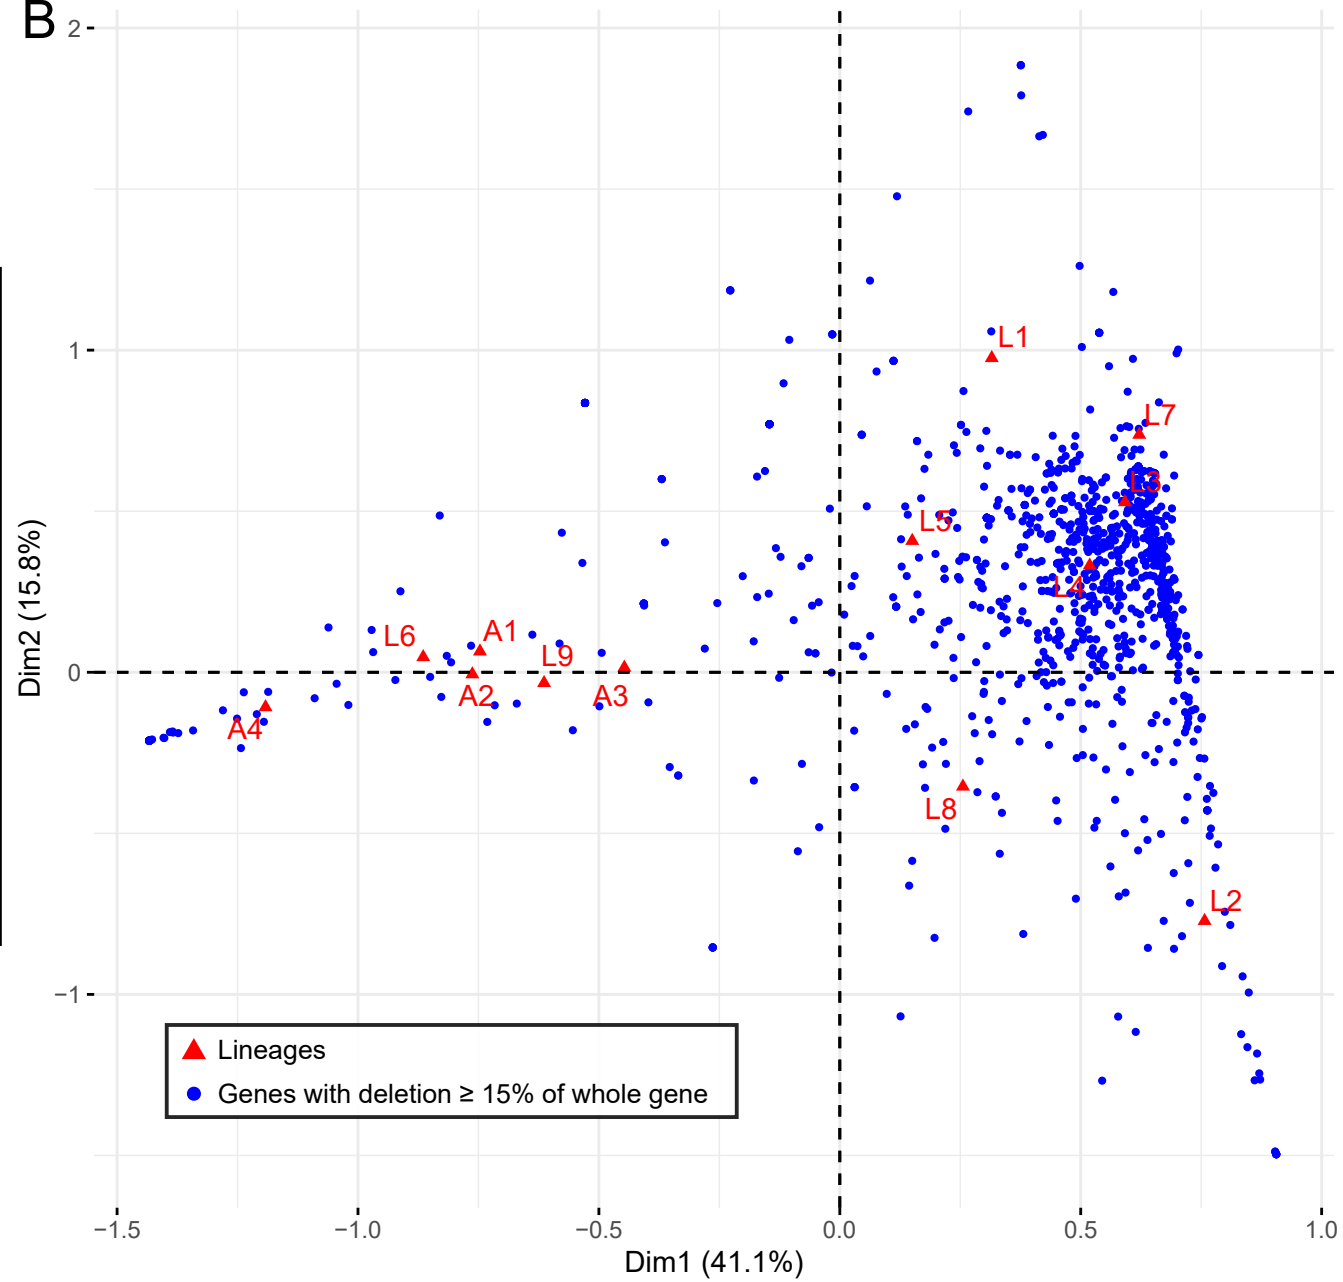

Supplement: s1 [file s1]

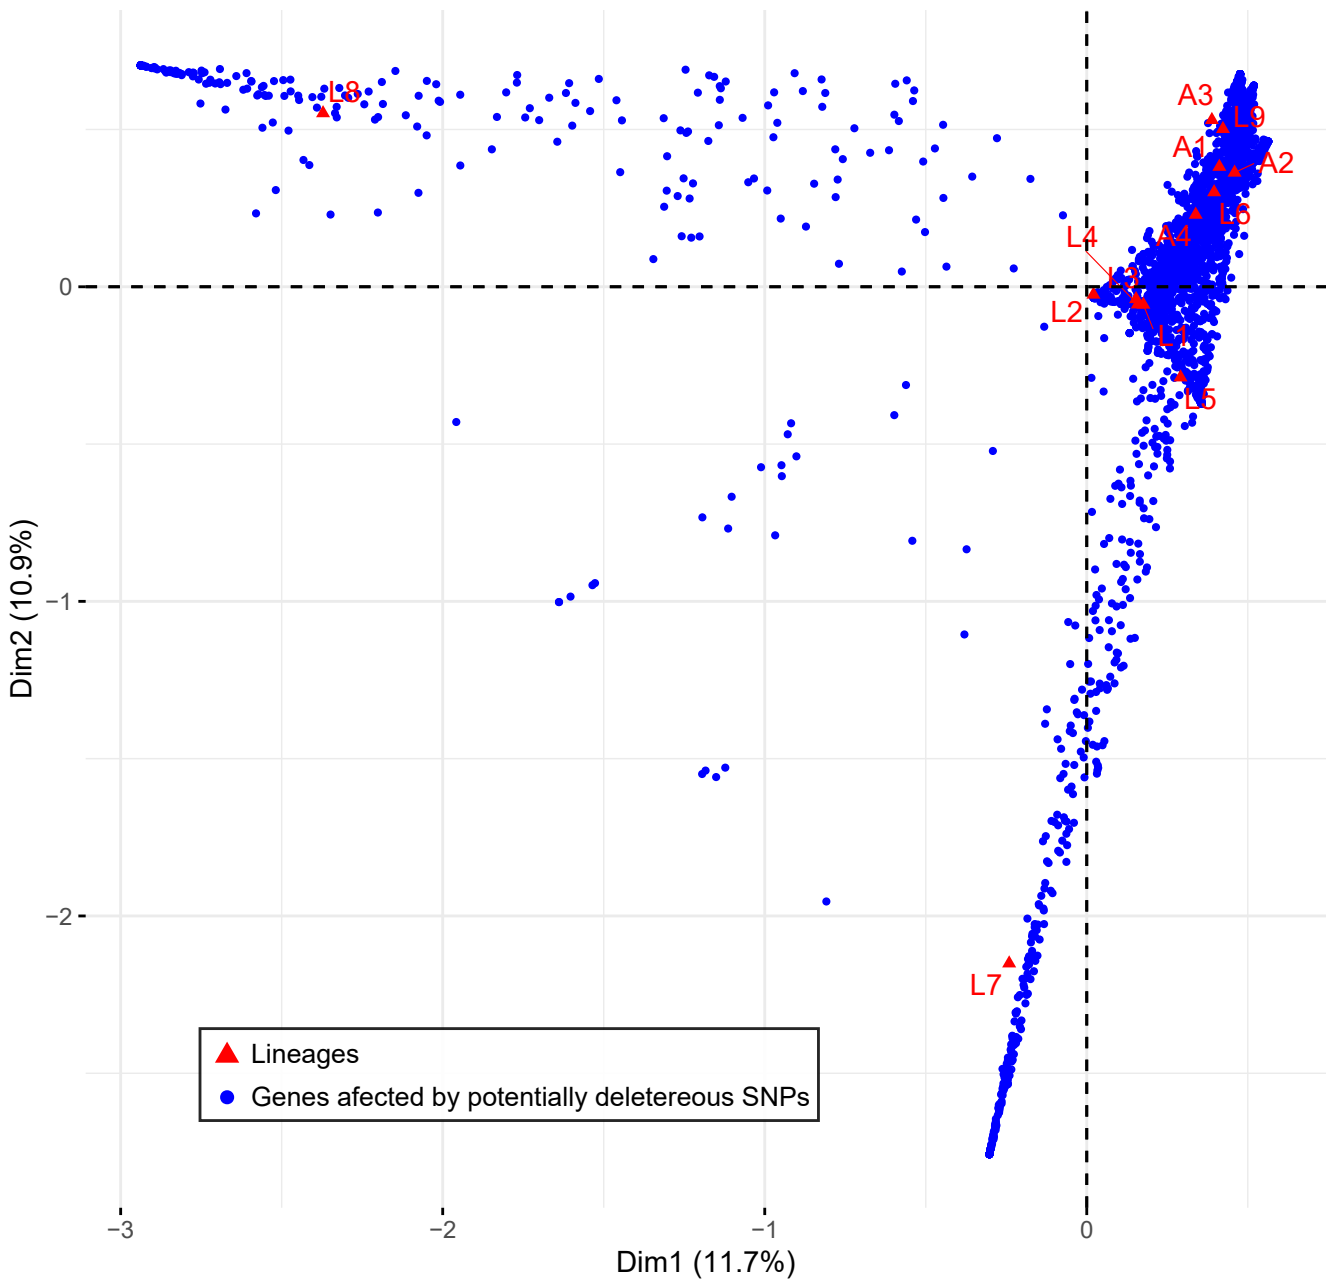

Supplement: s1 [file s1]

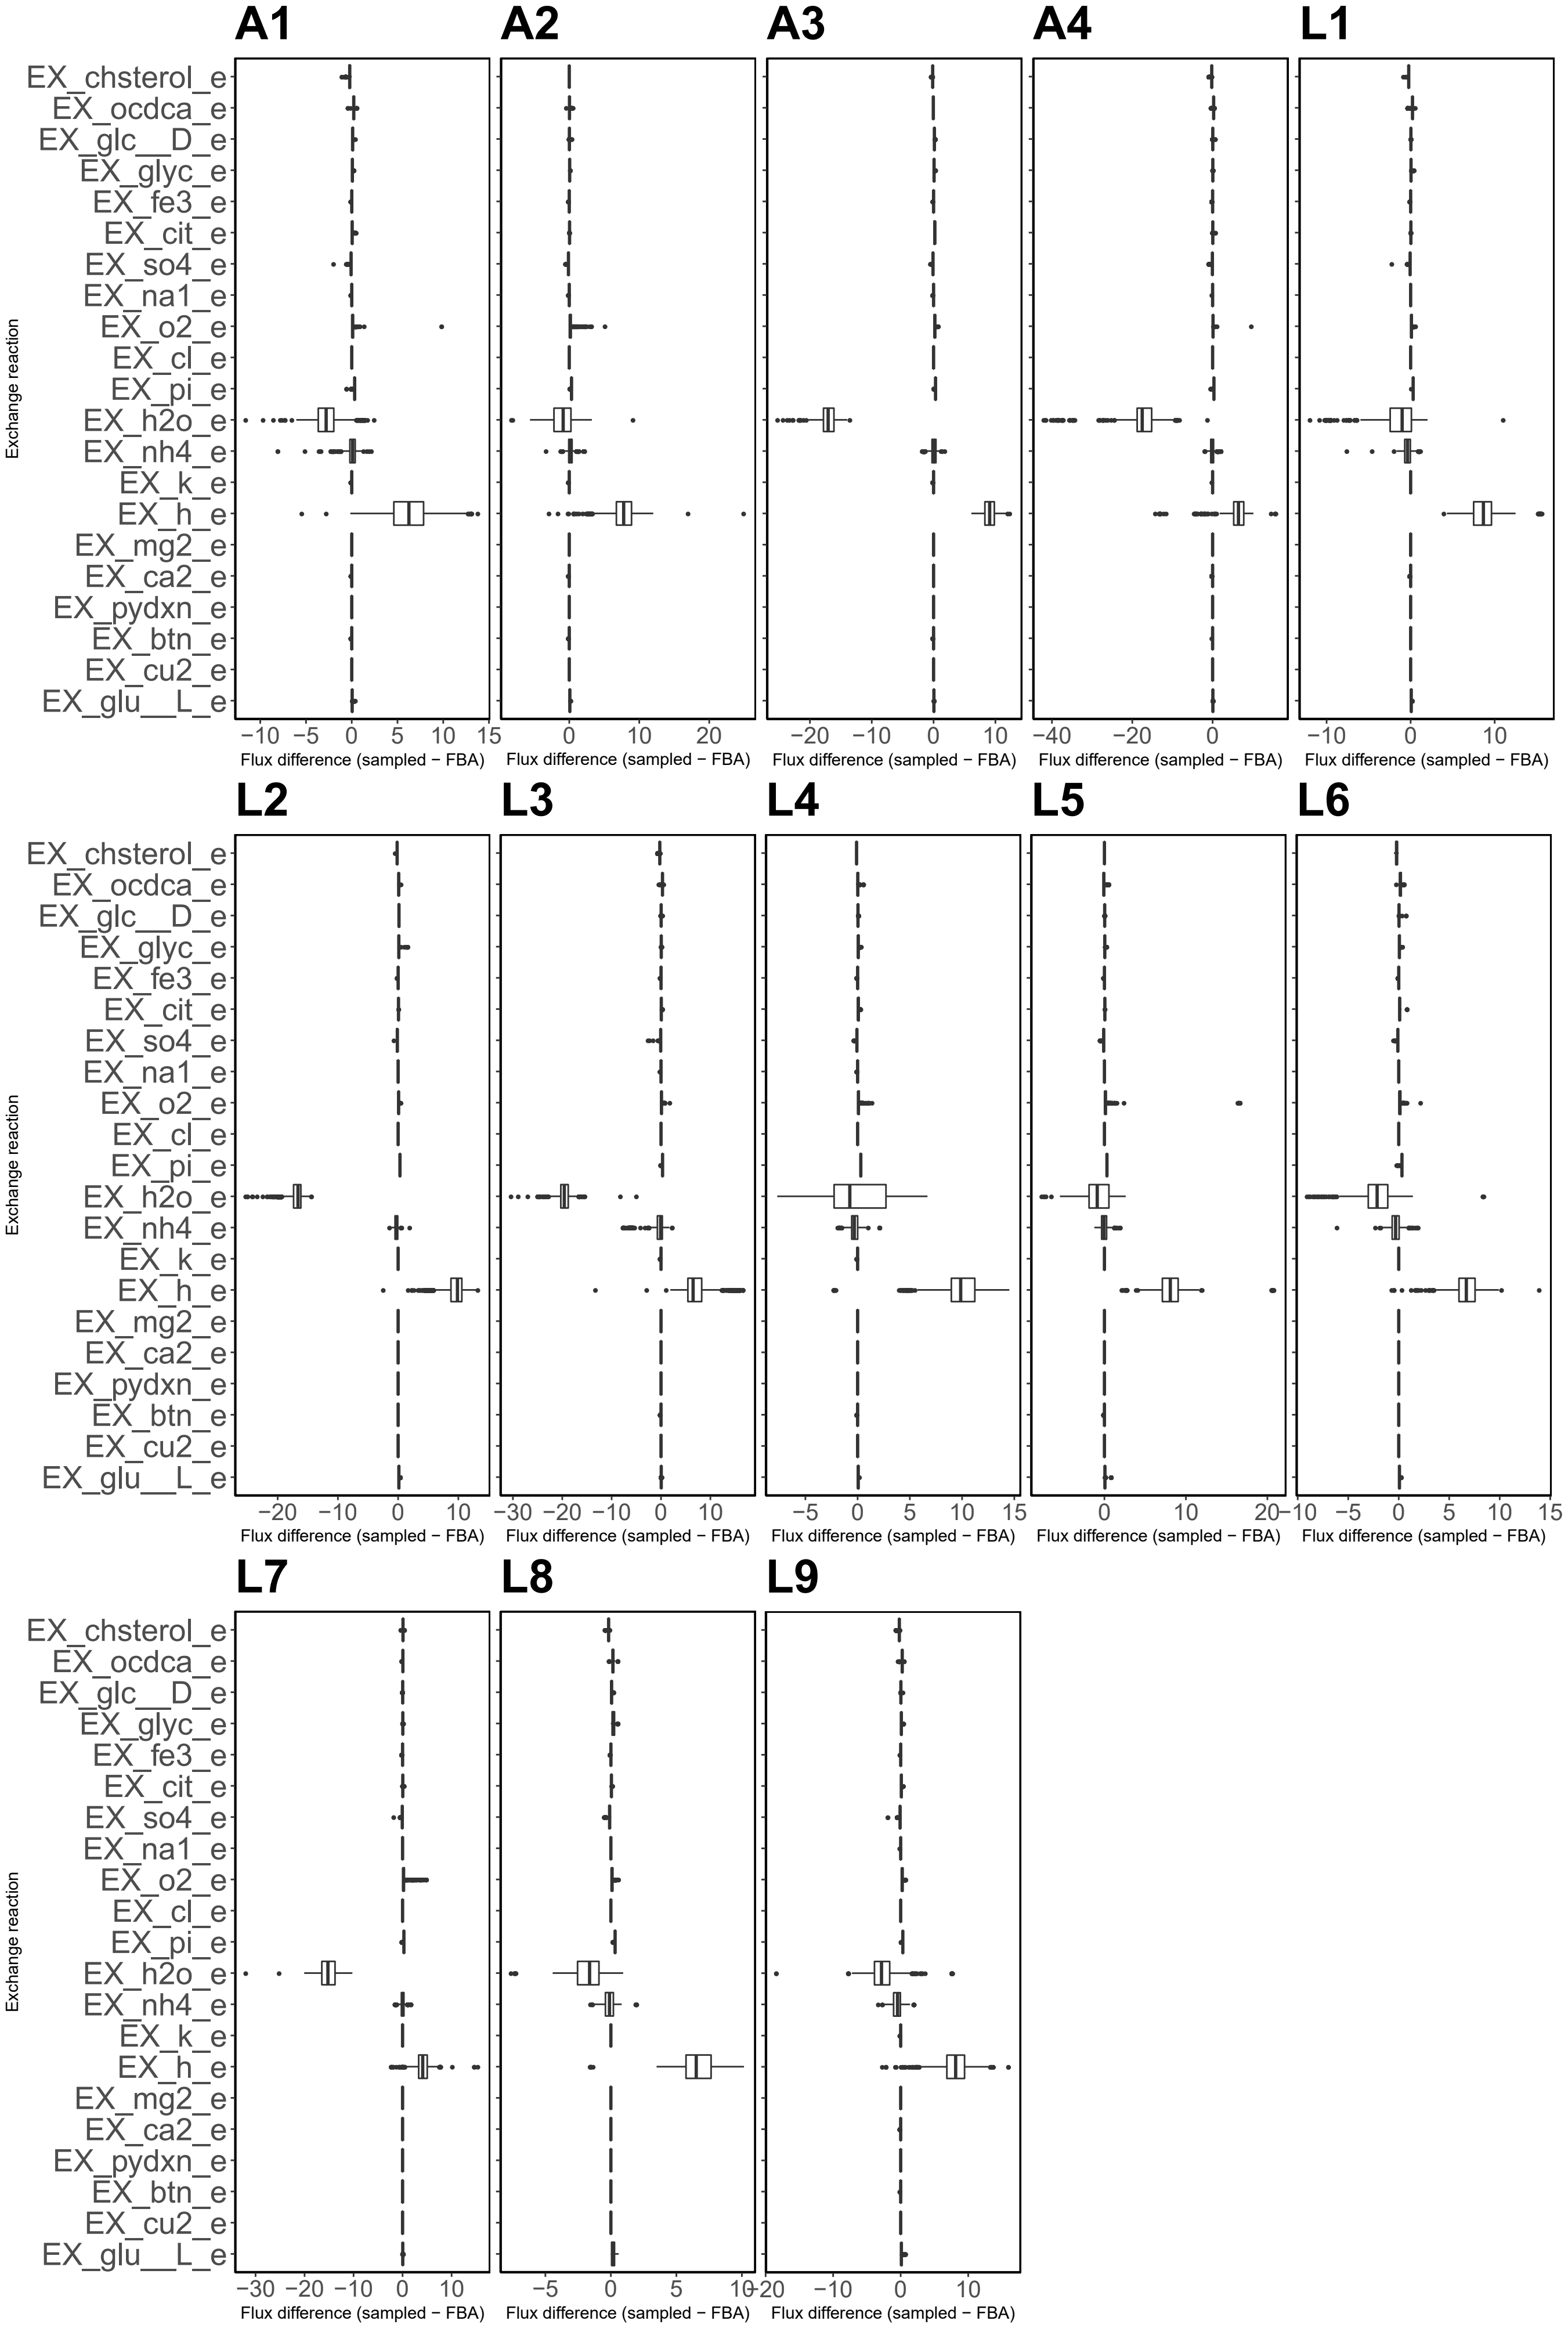

Supplement: s1 [file s1]

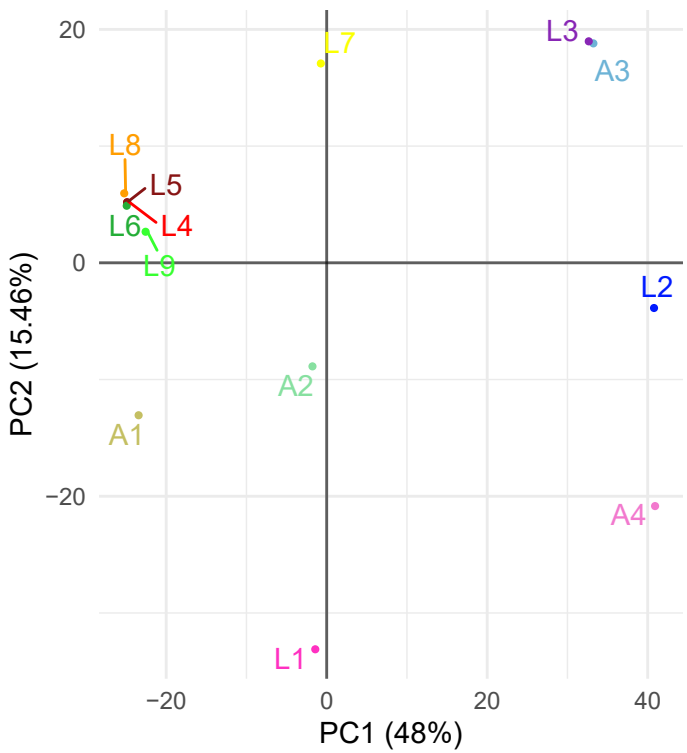

Supplement: s1 [file s1]

## Individuals – PCA

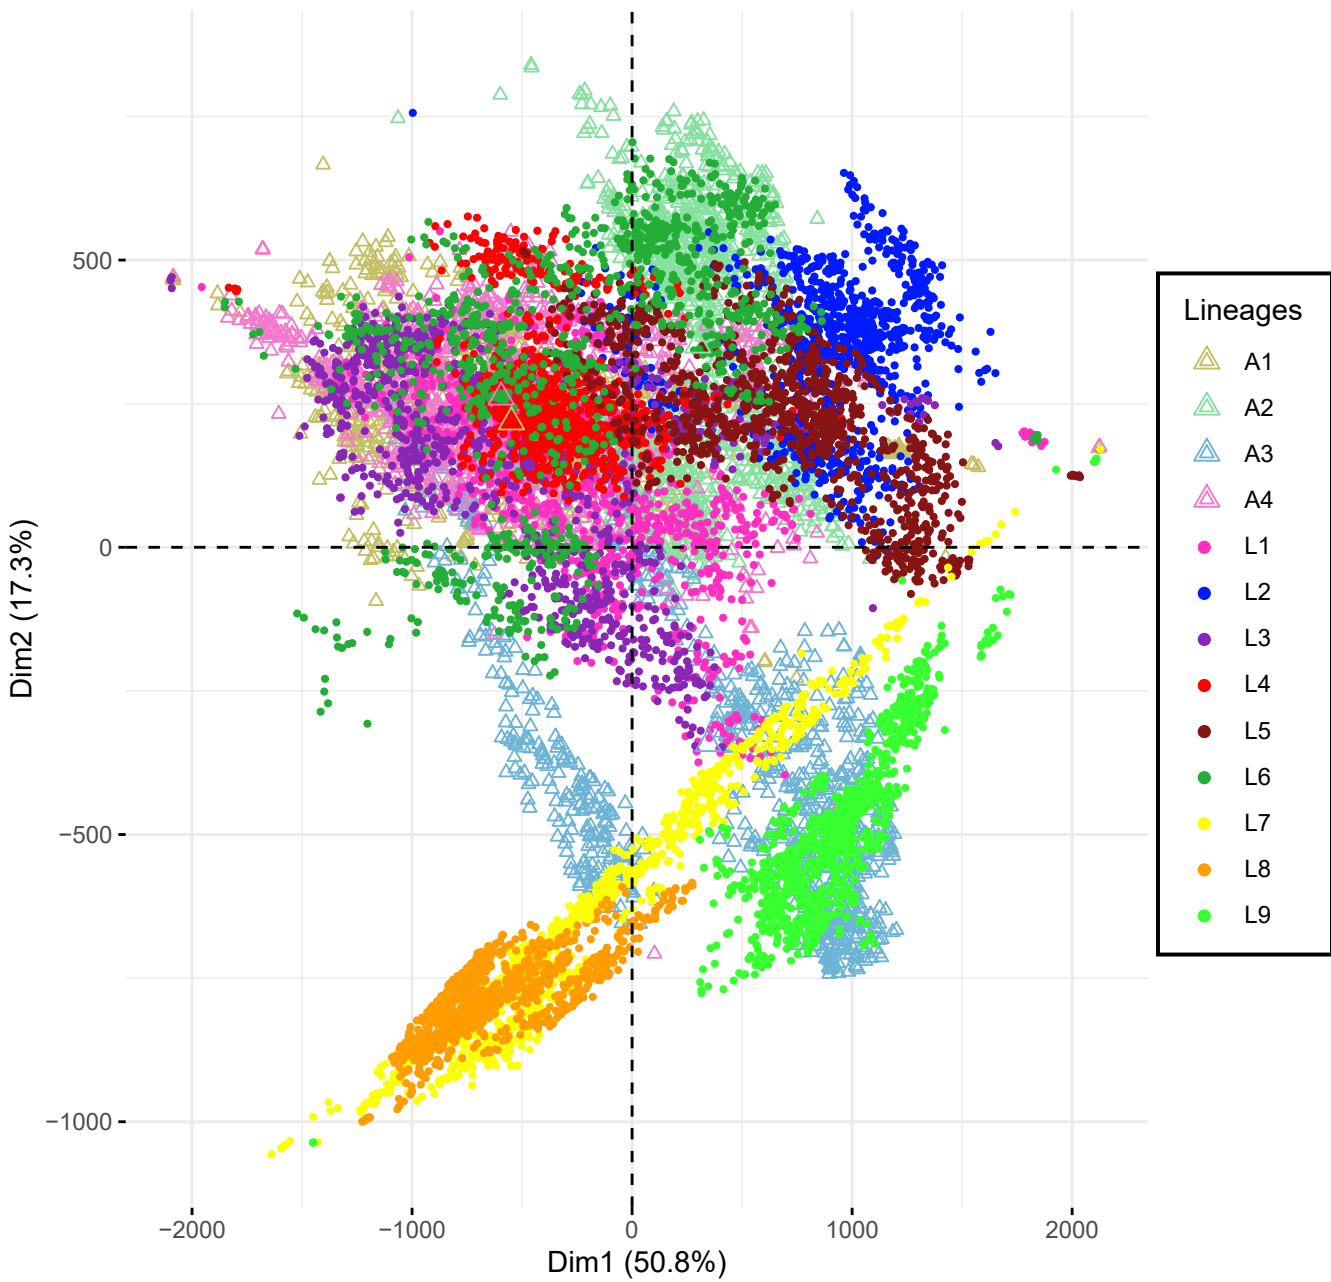

Supplement: s1 [file s1]
